# Supplementary material for: Major vault protein (MVP) suppresses aging- and estrogen deficiency-related bone loss through Fas-mediated apoptosis in osteoclasts
Source: Springer Nature journal article supplement (doi:10.1038/s41419-023-05928-4), 2023-09-13

Original Western Blots for Fig. 1B

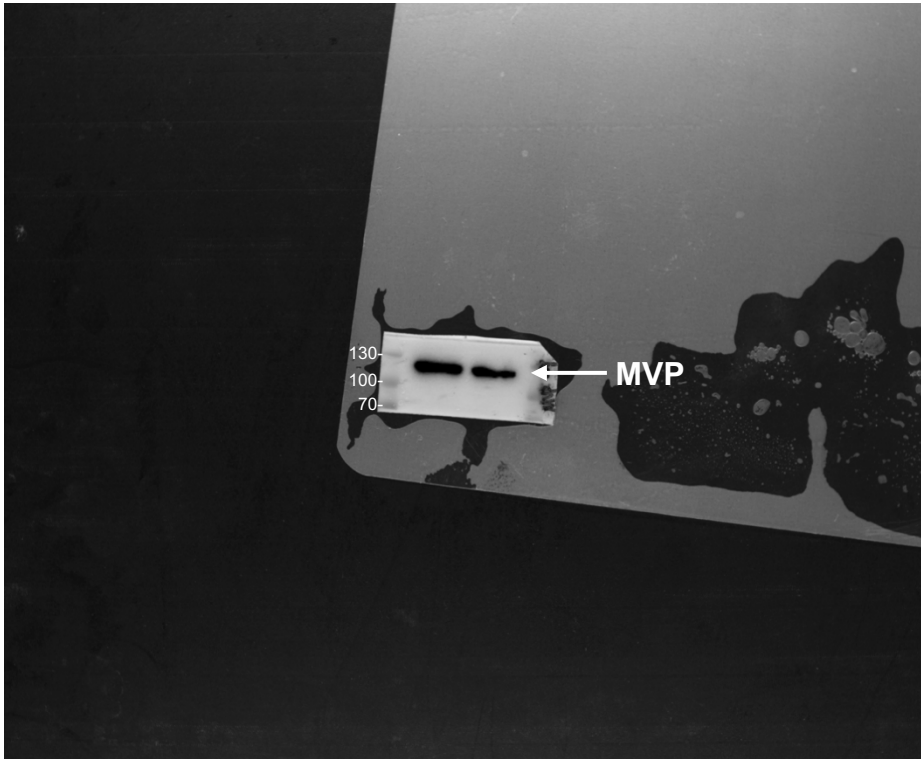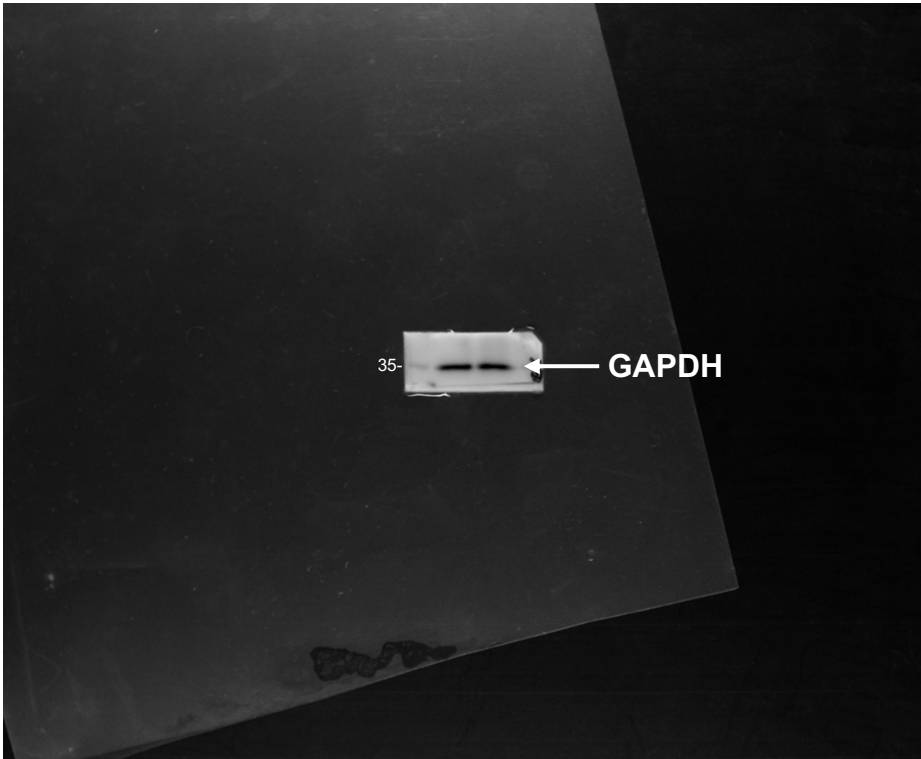

Original Western Blots for Fig. 2A

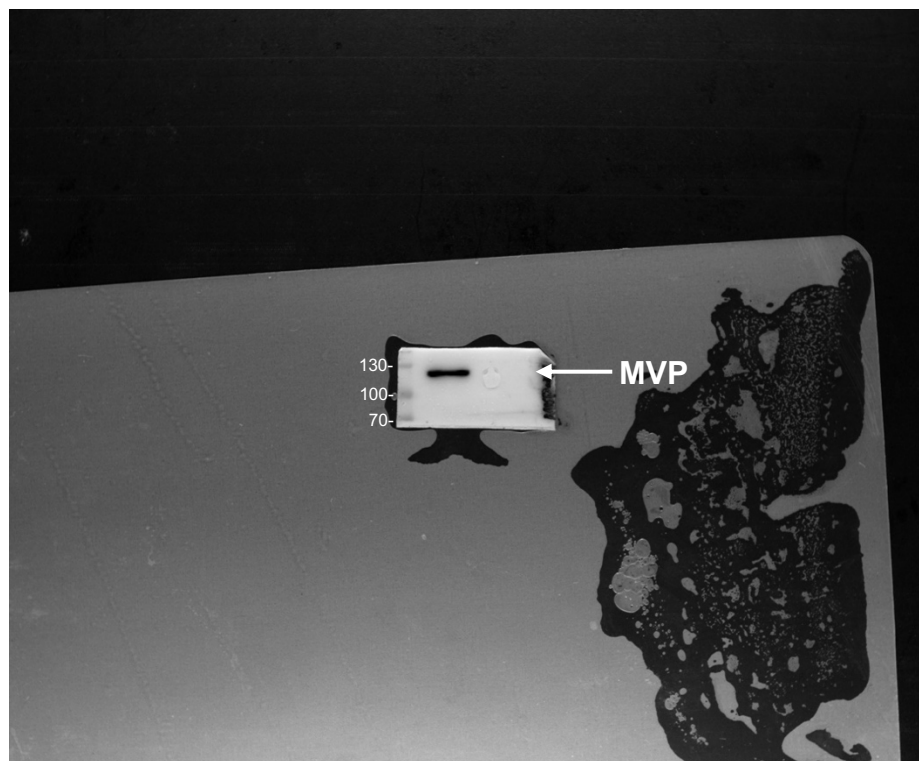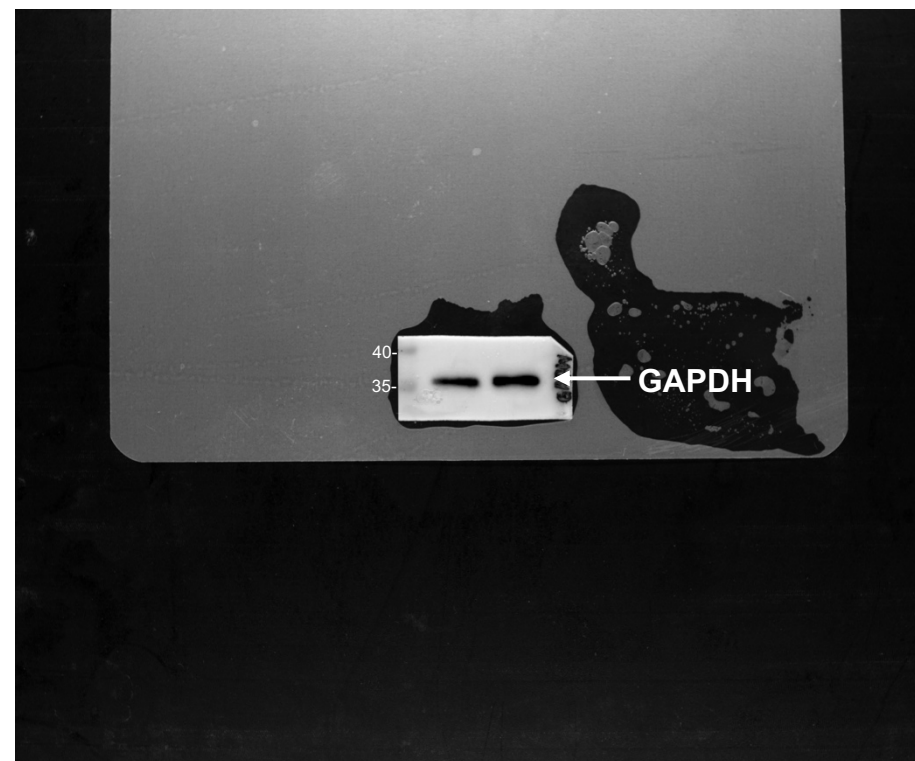

Original Western Blots for Fig. 4C (1/4)

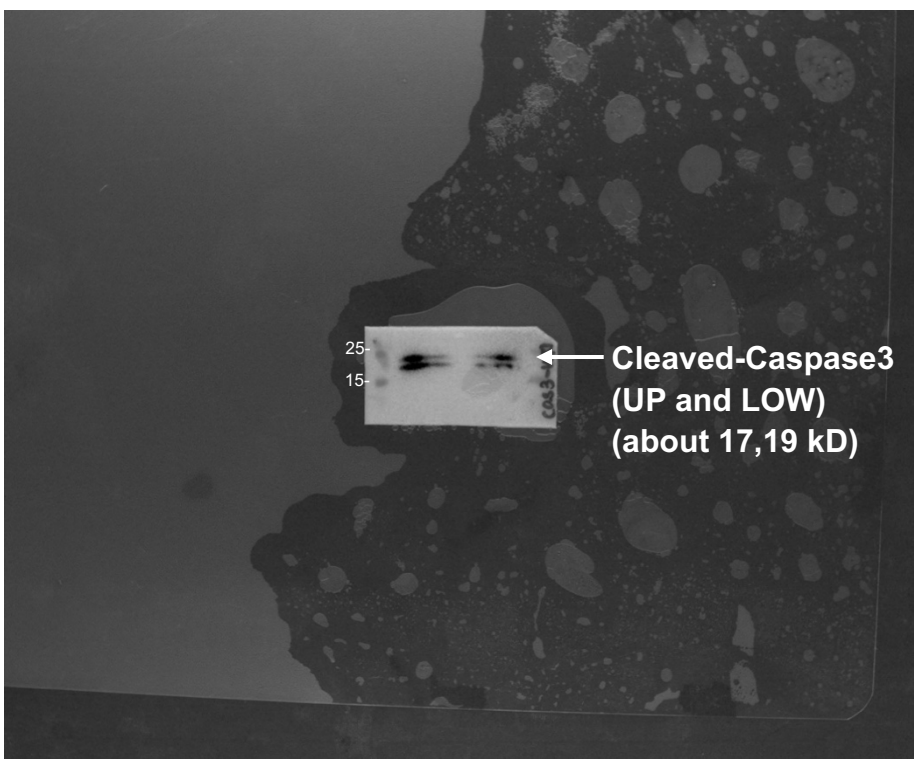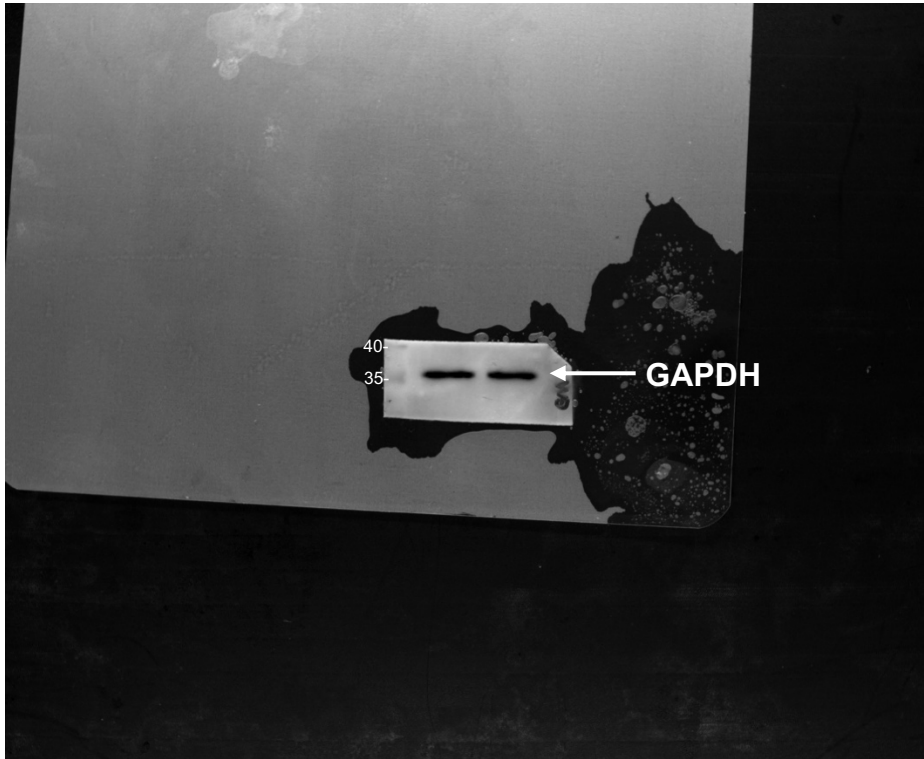

Original Western Blots for Fig. 4C (2/4)

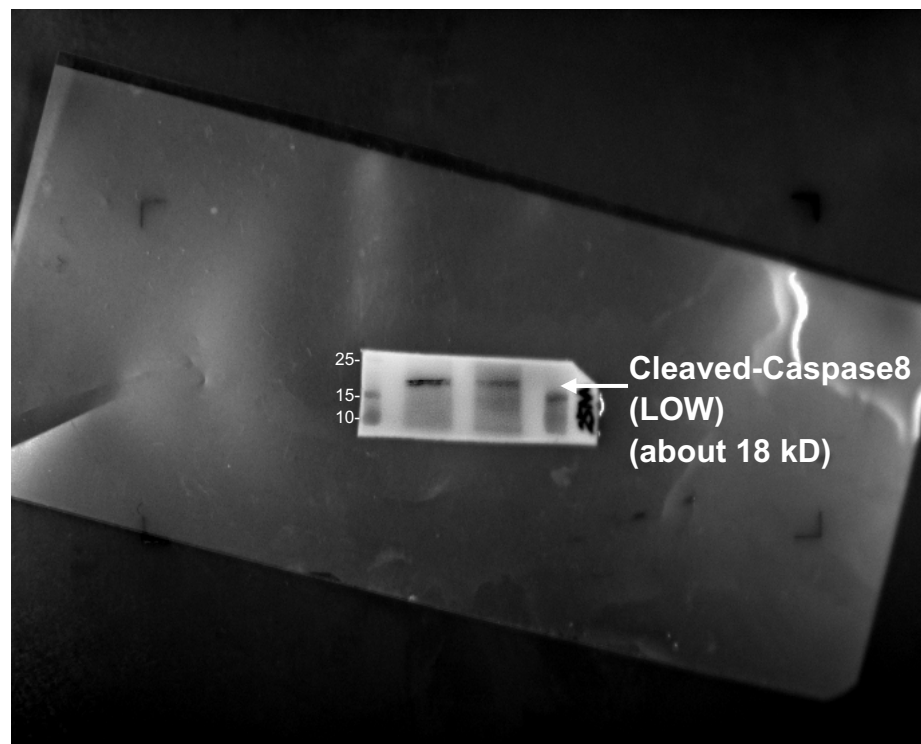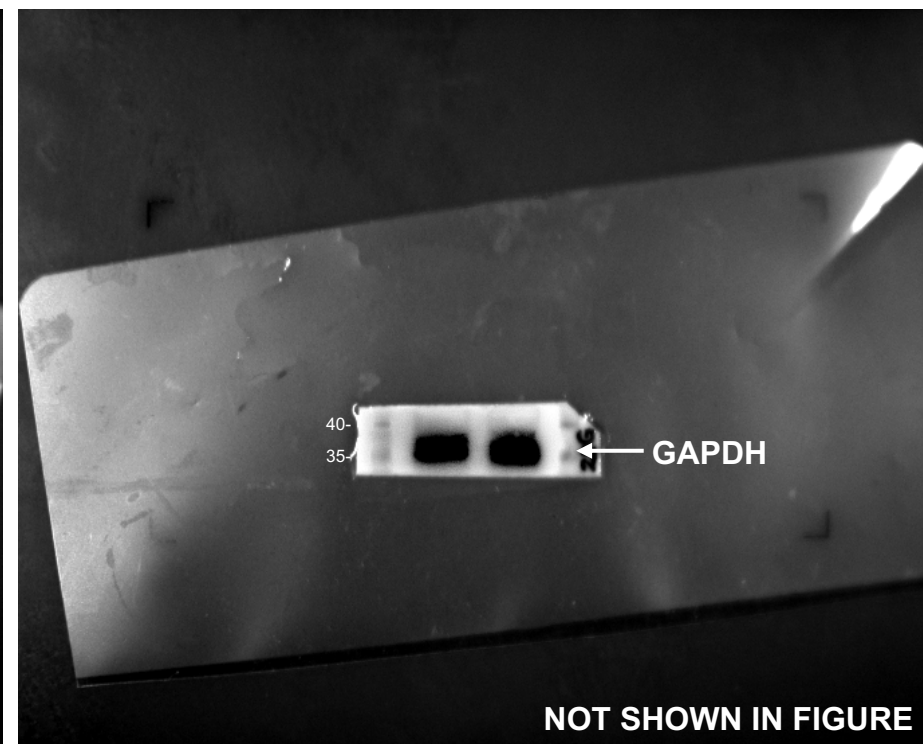



Original Western Blots for Fig. 4C (3/4)

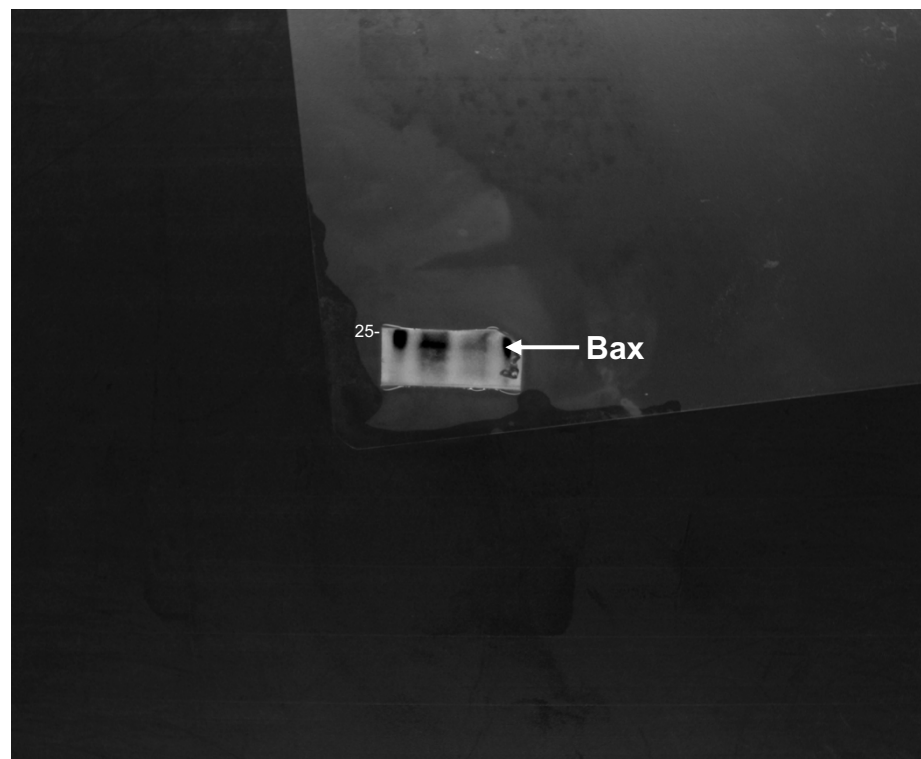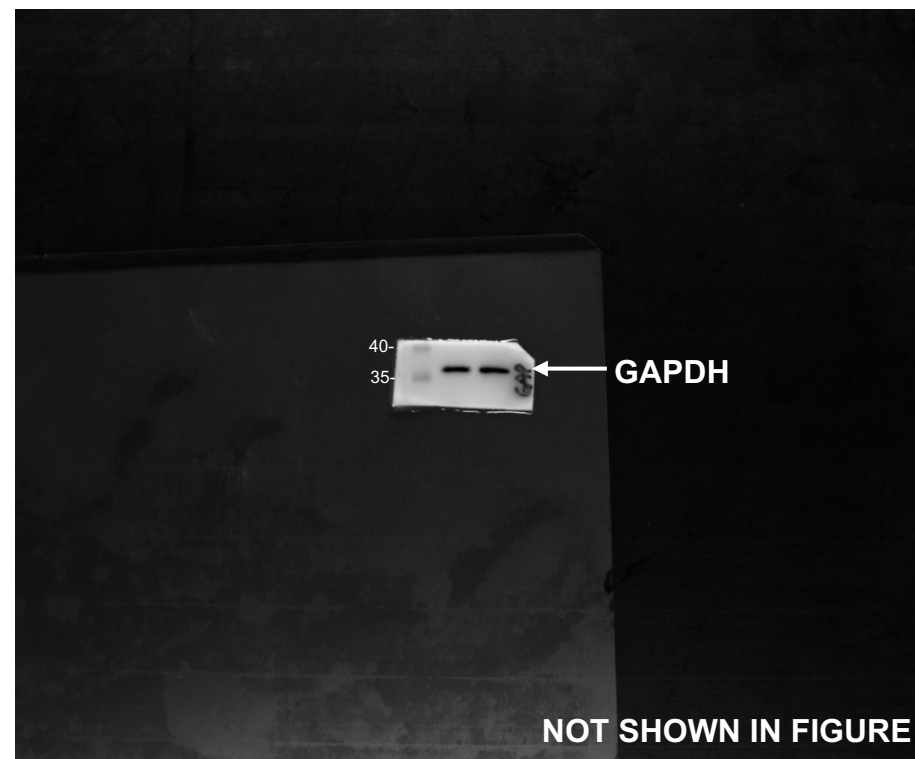

Original Western Blots for Fig. 4C (4/4)

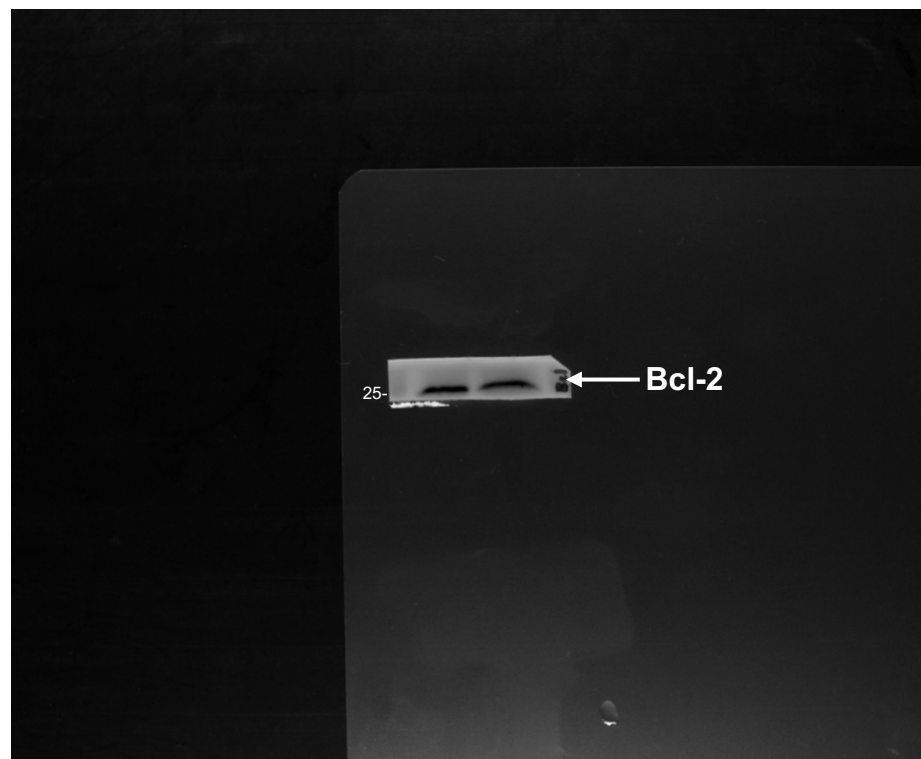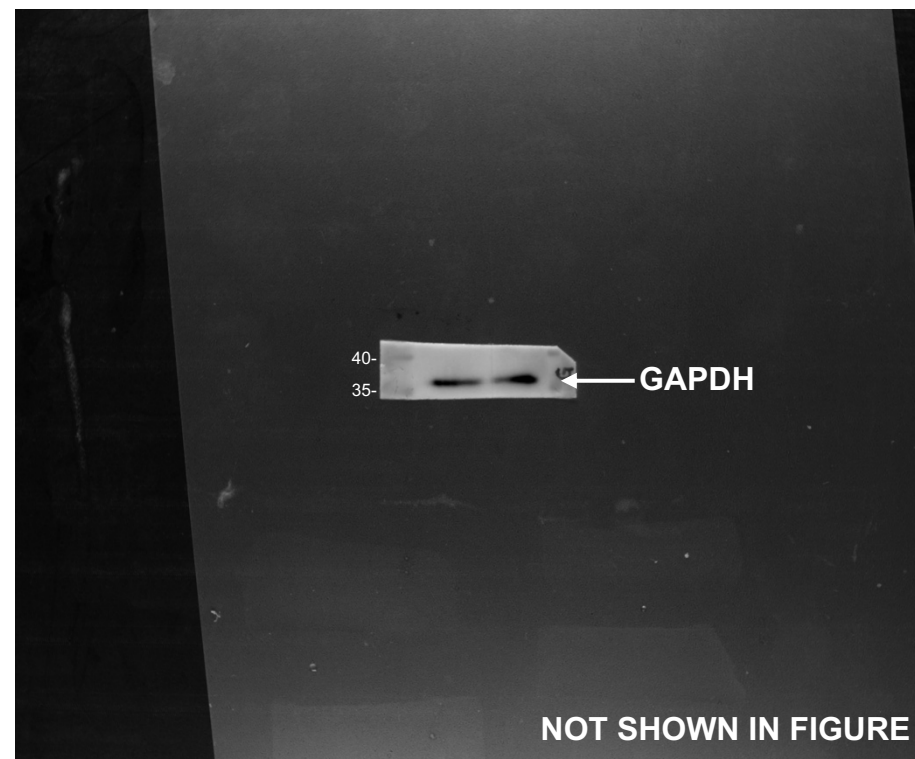

Original Western Blots for Fig. 4D

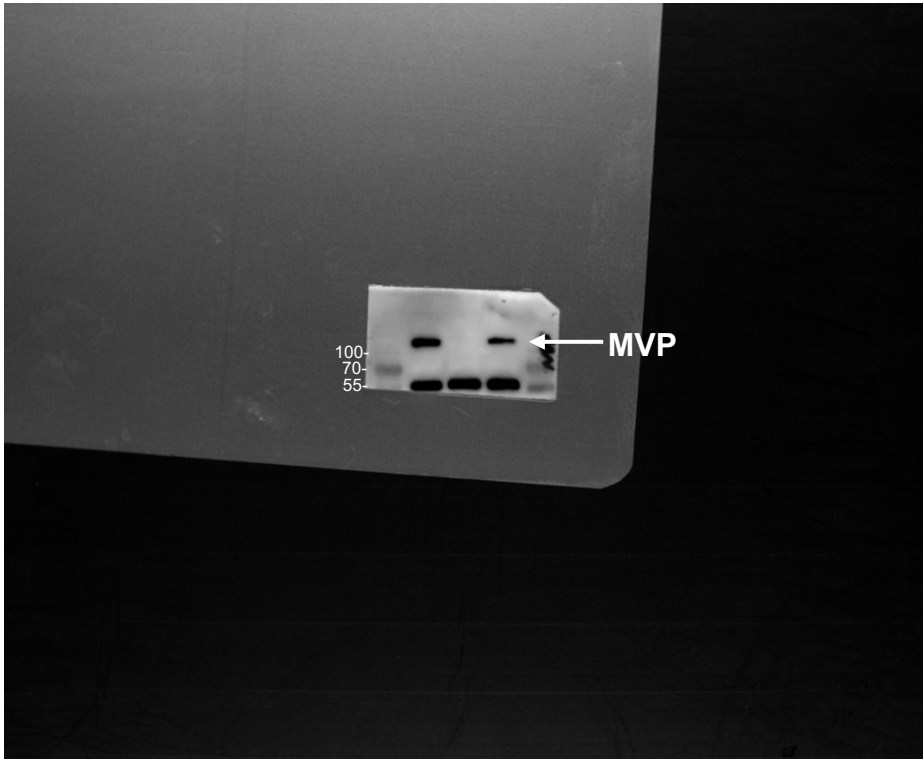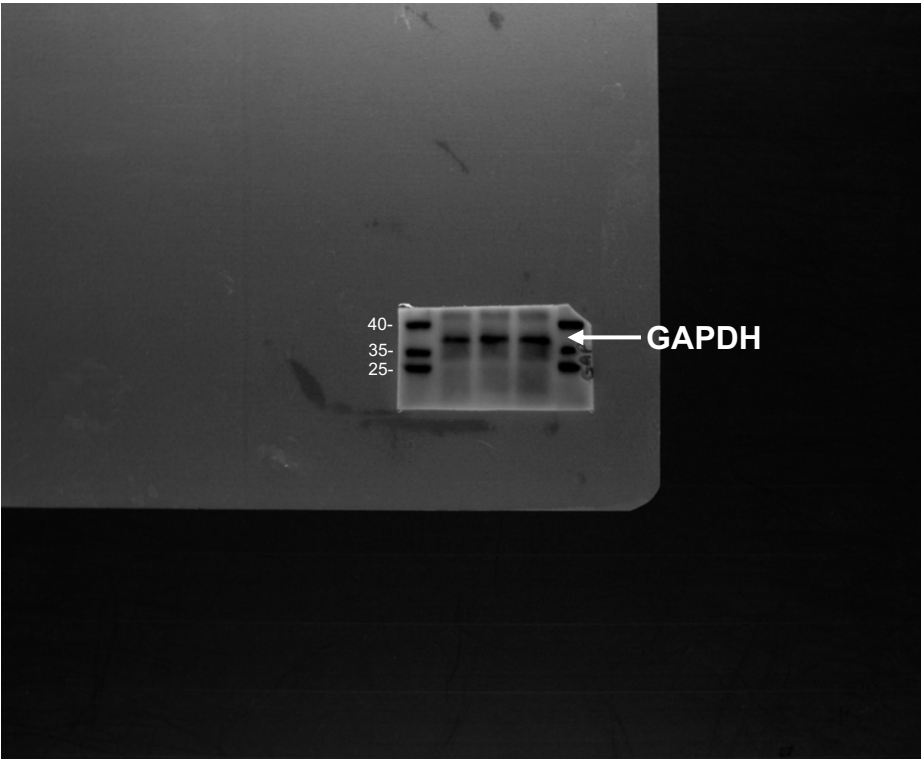

Original Western Blots for Fig. 5A

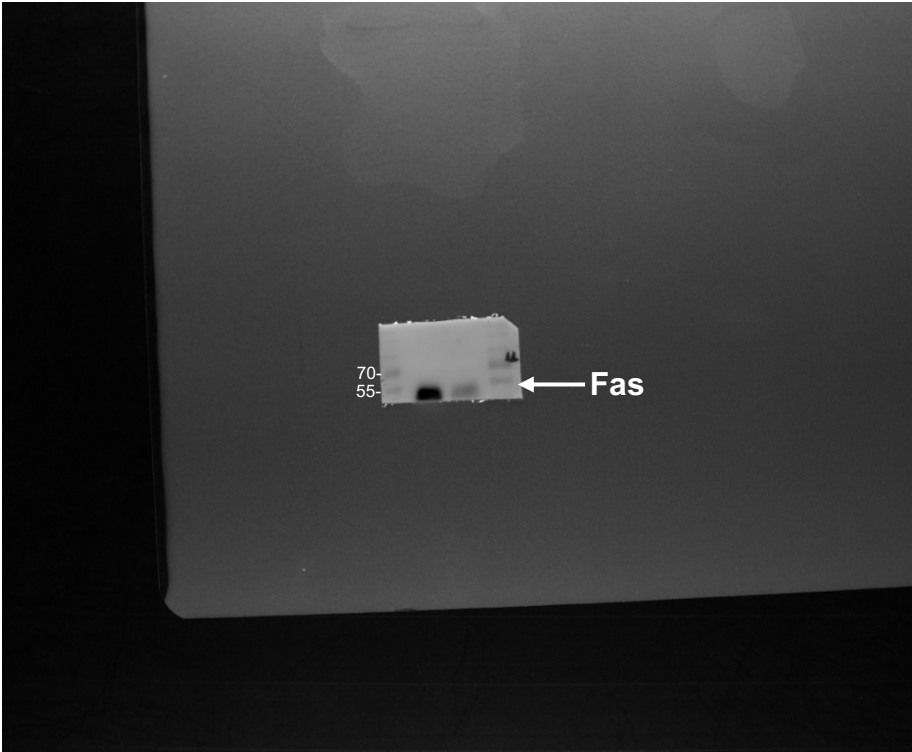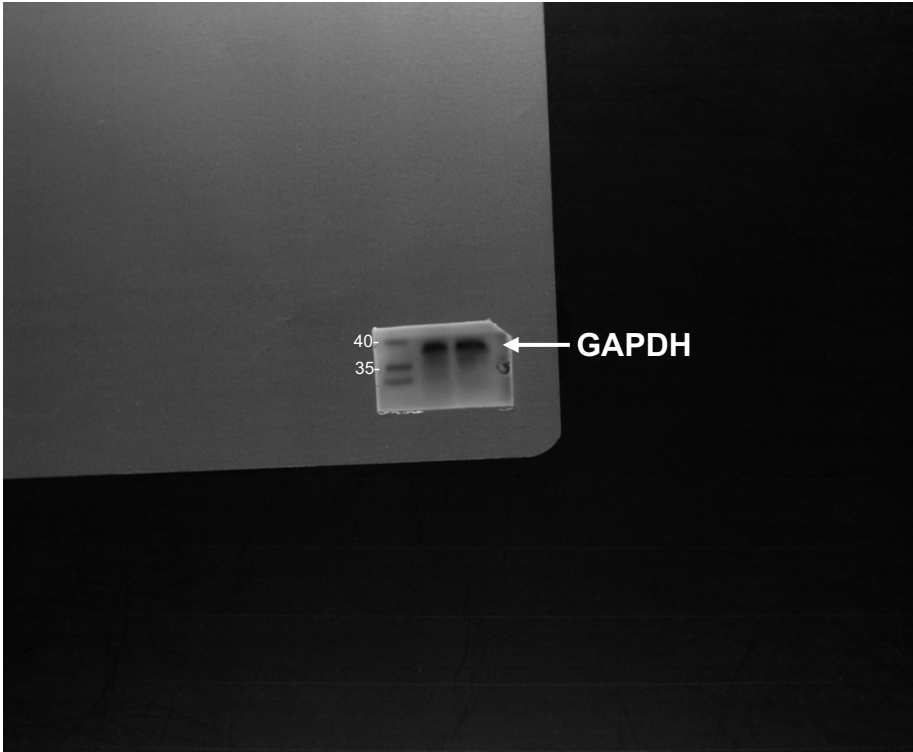

Original Western Blots for Fig. 5D (1/2) IP: Fas

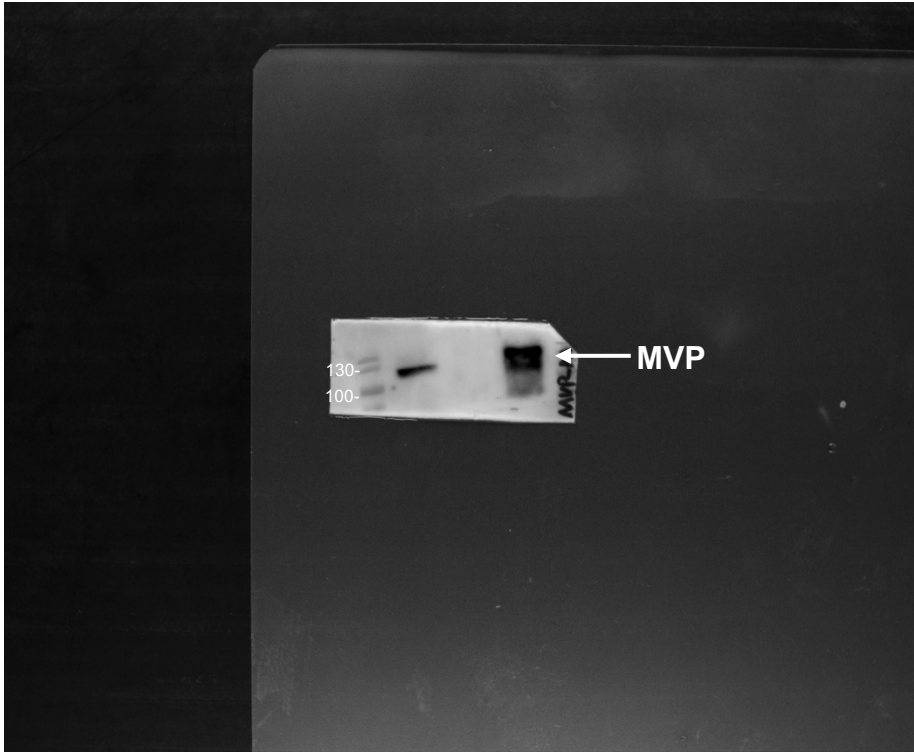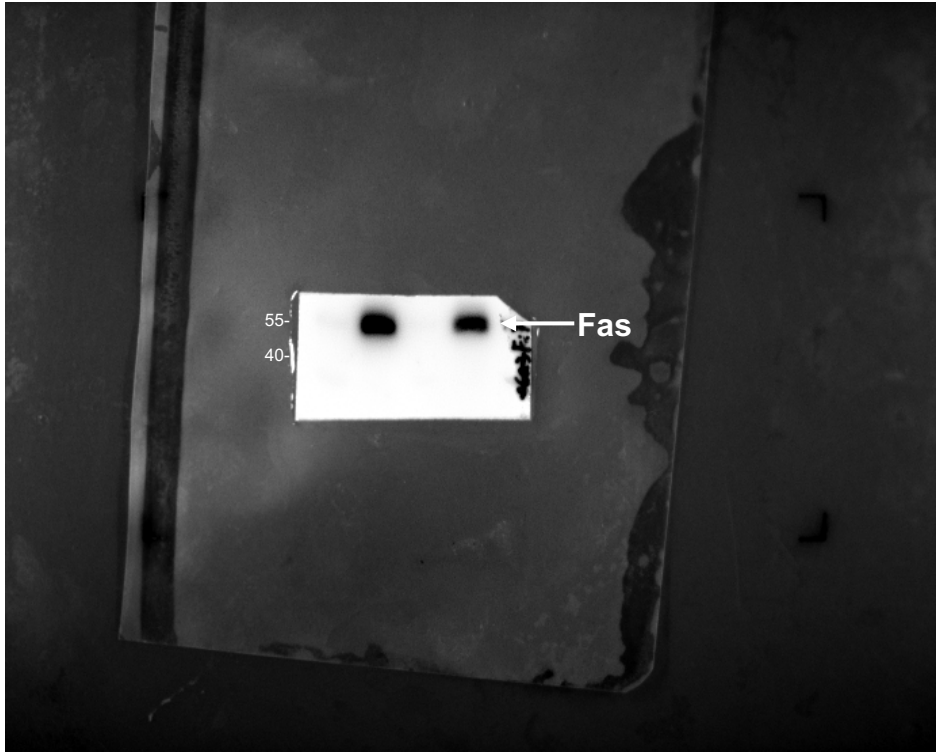

Original Western Blots for Fig. 5D (2/2) IP: MVP

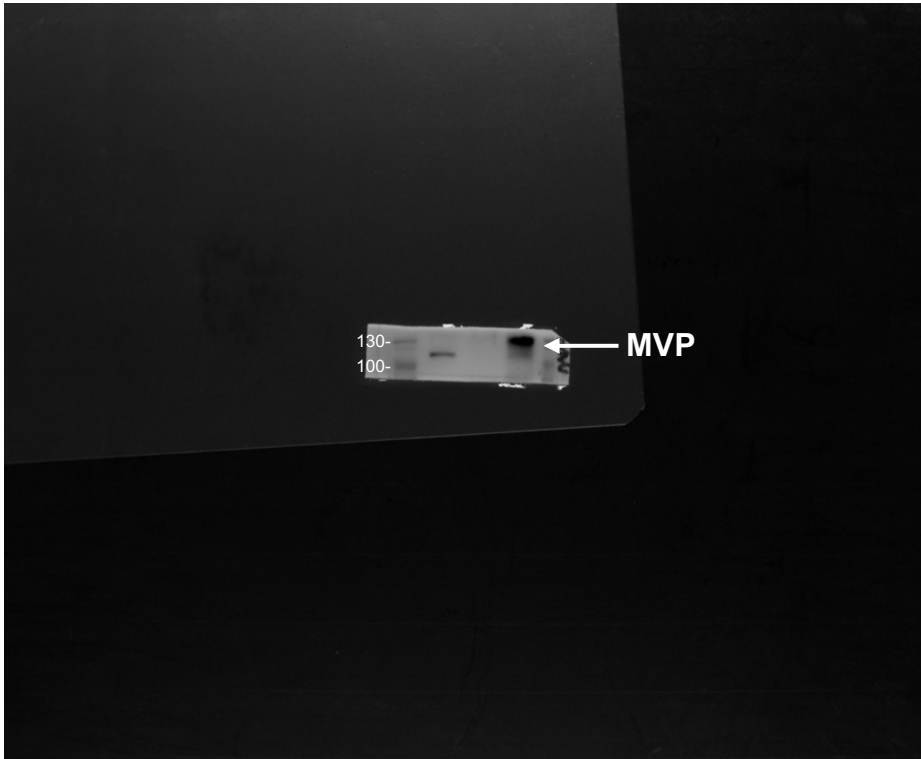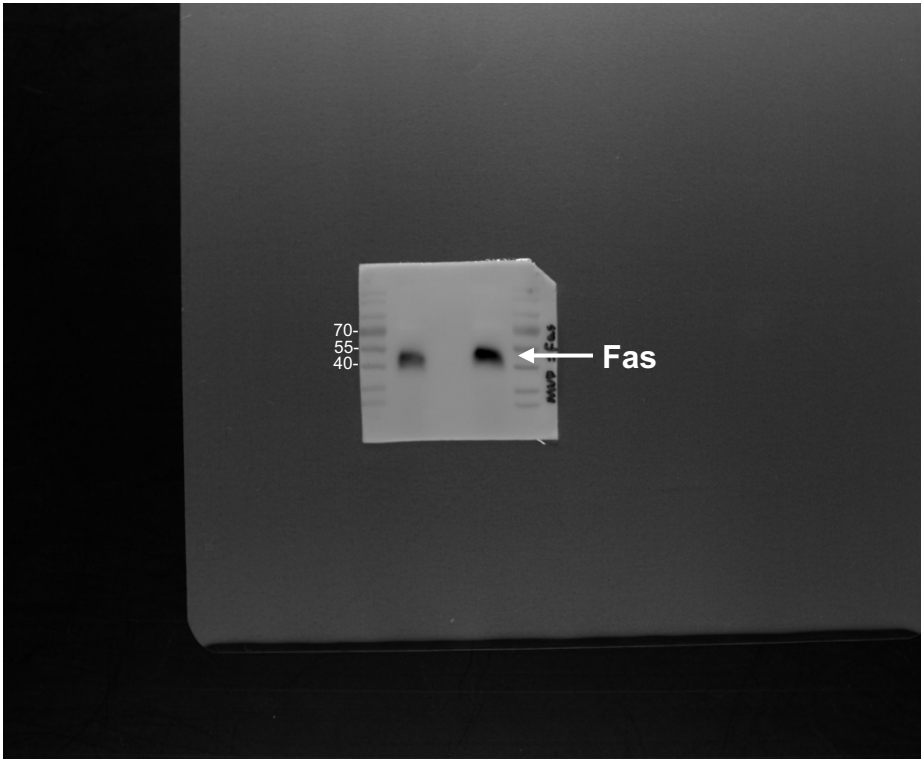

Original Western Blots for Fig. 5F (1/2)

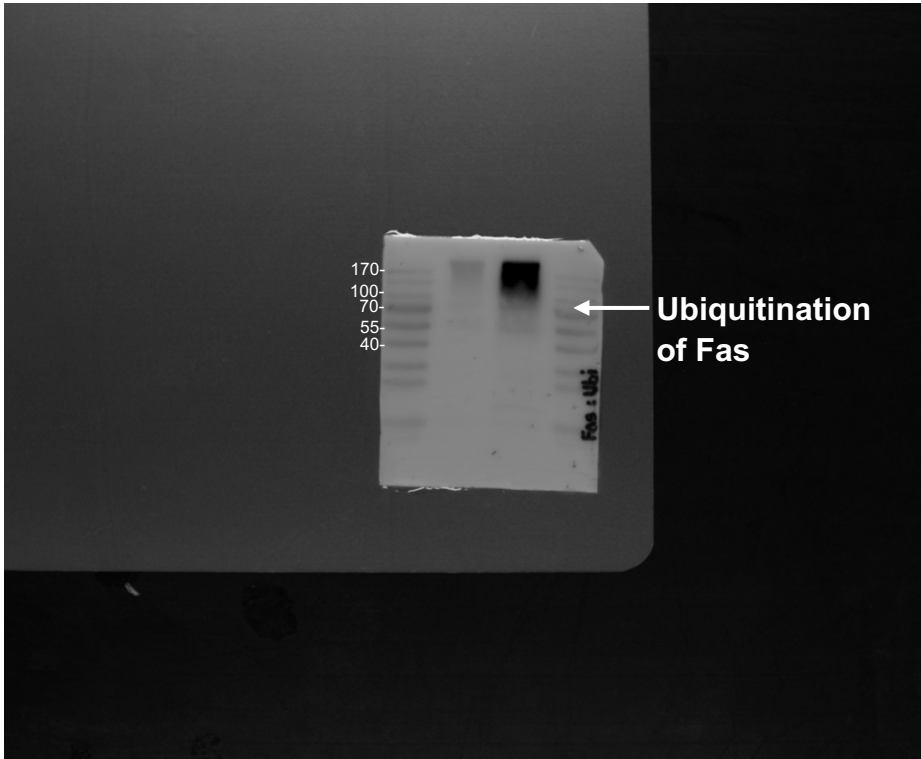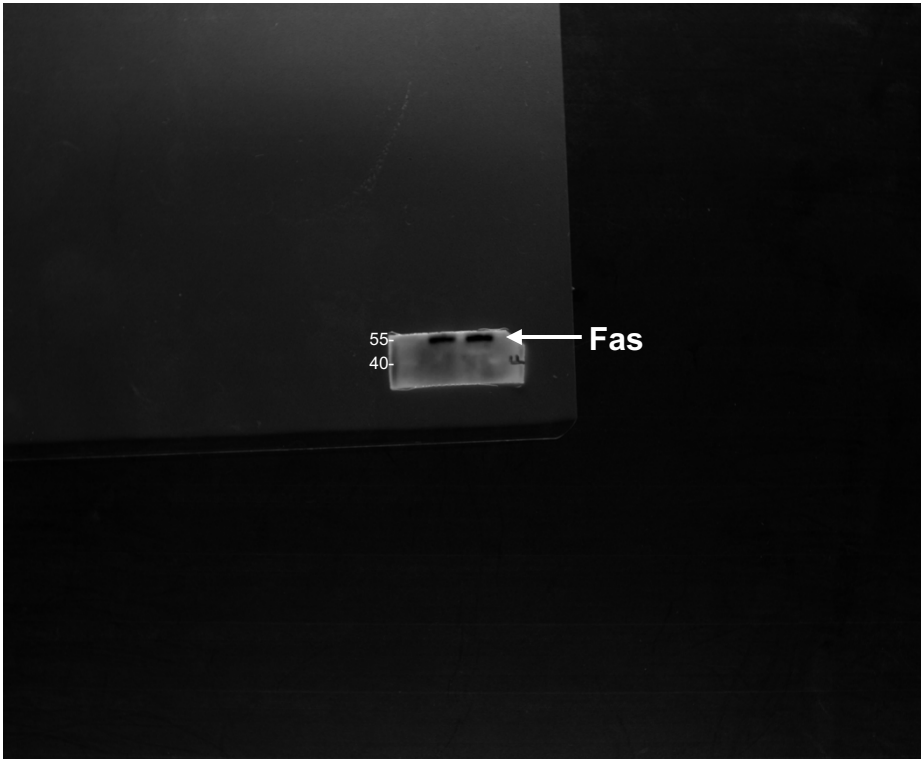

Original Western Blots for Fig. 5F (2/2)

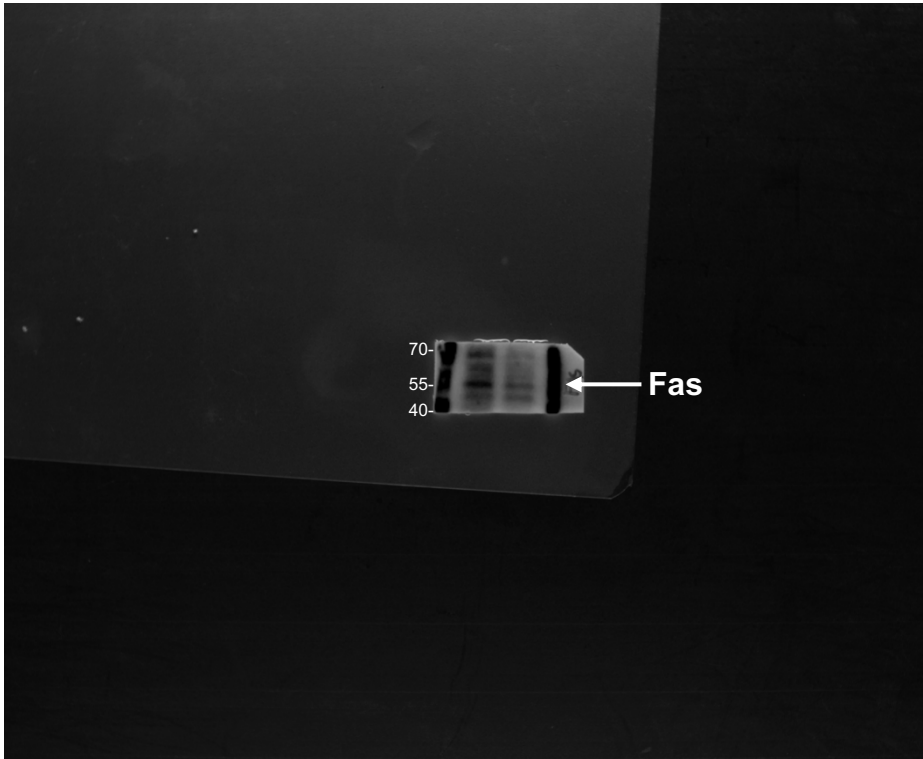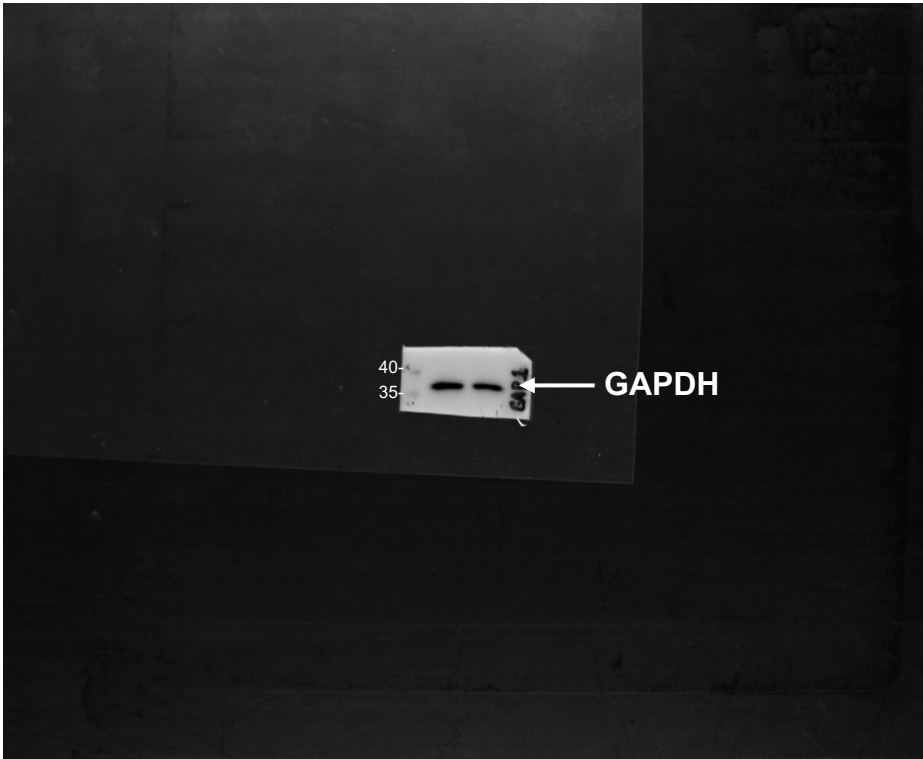



Original Western Blots for Supplementary Fig. 2

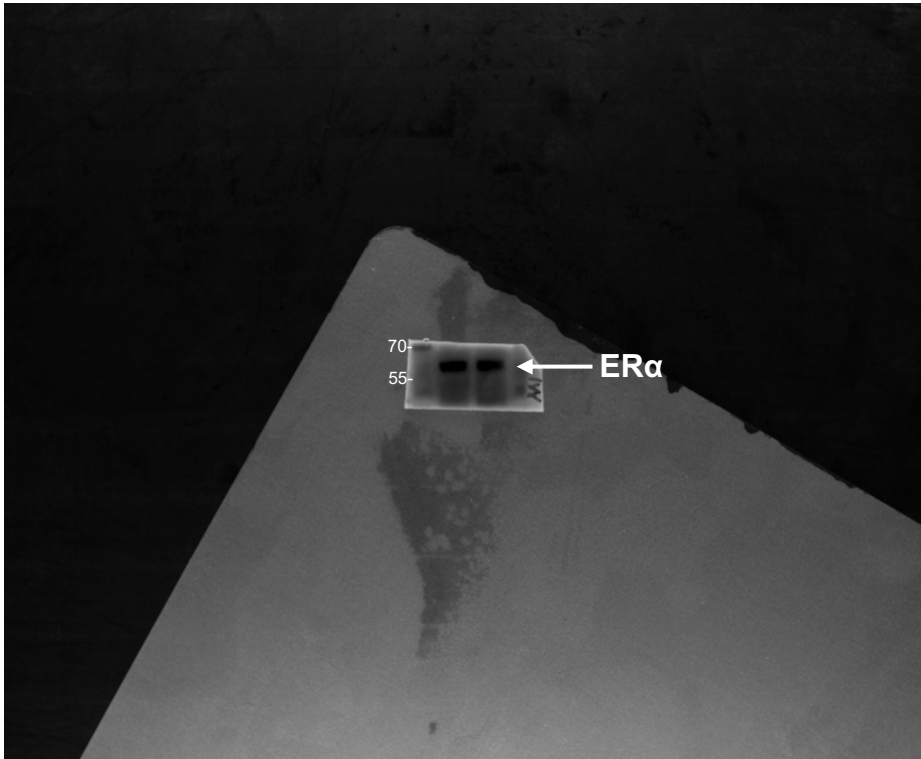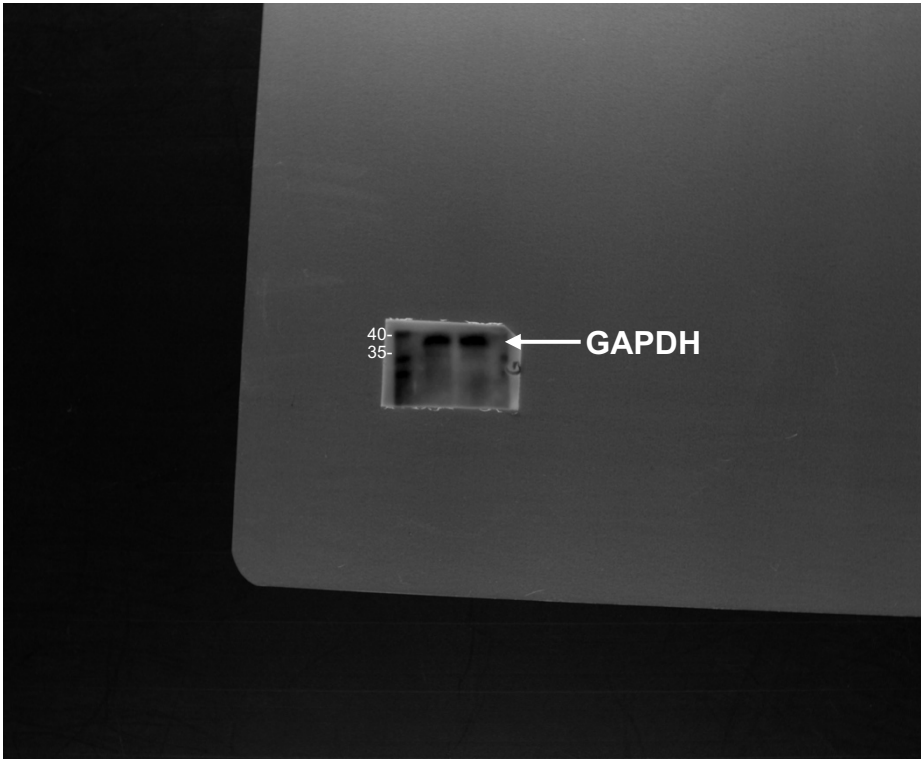

Supplement: MOESM6 [file 41419_2023_5928_MOESM6_ESM.pdf]
